# Supplementary material for: Comprehensive Lipid Profile of ‘Maraština’ Grape Skins from Dalmatia
Source: MDPI journal article supplement (doi:10.3390/app13116446), 2023-05-25
Supplement: s1 [file s1]

**Table S3.** Physicochemical characteristics of fresh musts obtained from ‘Maraština’ samples collected from 11 different vineyards.

| <b>Vineyard</b> | <b>Total soluble solids (°Brix)</b> | <b>pH</b>             | <b>Titrateable Acidity (g/L)</b> |
|-----------------|-------------------------------------|-----------------------|----------------------------------|
| <b>M1</b>       | 23.0±0.9 <sup>a</sup>               | 3.6±0.0 <sup>a</sup>  | 4.1±0.1 <sup>d</sup>             |
| <b>M2</b>       | 21.9±1.2 <sup>a</sup>               | 3.6±0.1 <sup>a</sup>  | 3.7±0.1 <sup>d</sup>             |
| <b>M3</b>       | 20.5±1.5 <sup>ab</sup>              | 3.3±0.0 <sup>b</sup>  | 5.0±0.3 <sup>b</sup>             |
| <b>M4</b>       | 23.4±1.0 <sup>a</sup>               | 3.5±0.1 <sup>a</sup>  | 5.0±0.2 <sup>b</sup>             |
| <b>M5</b>       | 22.6±0.3 <sup>a</sup>               | 3.3±0.0 <sup>b</sup>  | 5.7±0.1 <sup>ab</sup>            |
| <b>M6</b>       | 22.1±1.5 <sup>a</sup>               | 3.5±0.1 <sup>a</sup>  | 4.9±0.1 <sup>bc</sup>            |
| <b>M7</b>       | 22.4±0.5 <sup>a</sup>               | 3.6±0.0 <sup>a</sup>  | 6.4±0.2 <sup>a</sup>             |
| <b>M8</b>       | 18.1±0.6 <sup>b</sup>               | 3.5±0.1 <sup>ab</sup> | 5.7±0.7 <sup>ab</sup>            |
| <b>M9</b>       | 18.8±0.6 <sup>b</sup>               | 3.6±0.1 <sup>a</sup>  | 4.1±0.3 <sup>cd</sup>            |
| <b>M10</b>      | 22.4±1.0 <sup>a</sup>               | 3.5±0.1 <sup>ab</sup> | 3.9±0.2 <sup>d</sup>             |
| <b>M11</b>      | 21.9±1.4 <sup>a</sup>               | 3.6±0.0 <sup>a</sup>  | 3.7±0.3 <sup>d</sup>             |

Values are expressed as means ± standard deviations. Within each column, means followed by different superscript letters (<sup>a, b, c, d</sup>) are significantly different ( $p < 0.05$ ).
