# Supplementary material for: Comprehensive Lipid Profile of ‘Maraština’ Grape Skins from Dalmatia
Source: MDPI journal article supplement (doi:10.3390/app13116446), 2023-05-25
Supplement: s1 [file s1]

**Table S1.** General vineyard parameters.

| Vineyard | Geographical position        | Altitude (m) | Plantation year | Soil type               | Trellis system   |
|----------|------------------------------|--------------|-----------------|-------------------------|------------------|
| M1       | 44° 7' 23" N, 15° 28' 52" E  | 60           | 2009            | sand                    | bilateral cordon |
| M2       | 44° 0' 28" N, 15° 29' 41" E  | 103          | 2010            | reclaimed karst         | bilateral cordon |
| M3       | 43° 57' 20" N, 15° 43' 6" E  | 130          | 2008            | brown                   | bilateral cordon |
| M4       | 43° 56' 37" N, 15° 43' 46" E | 130          | 2003            | sand                    | bilateral cordon |
| M5       | 43° 56' 55" N, 16° 4' 56" E  | 260          | 2006            | brown                   | bilateral cordon |
| M6       | 43° 33' 34" N, 16° 22' 32" E | 94           | 2011            | red                     | bilateral cordon |
| M7       | 43°30' 35" N, 16°29' 85" E   | 14           | 2005            | brown soil on limestone | bilateral cordon |
| M8       | 42°55' 36" N, 16° 54' 0" E   | 62           | 1941            | red                     | bilateral cordon |
| M9       | 42°54' 51" N, 16°54' 58" E   | 40           | 2000            | loam                    | bilateral cordon |
| M10      | 42° 54' 50" N, 16° 54' 52" E | 40           | 2008            | sand                    | bilateral cordon |
| M11      | 42° 55' 20" N, 16° 53' 54" E | 68           | 1999            | red                     | bilateral cordon |
