# Supplementary material for: Comprehensive Lipid Profile of ‘Maraština’ Grape Skins from Dalmatia
Source: MDPI journal article supplement (doi:10.3390/app13116446), 2023-05-25
Supplement: s1 [file s1]

**Table S4.** Mass transitions (MRM) and instrumental parameters of LC-ESI-MS/MS method.

| Compound                            | Ionization Mode                   | Precursor ion | Q1          |      |     |       |     | Q2          |      |     |     |     | RT (min) |
|-------------------------------------|-----------------------------------|---------------|-------------|------|-----|-------|-----|-------------|------|-----|-----|-----|----------|
|                                     |                                   |               | Product ion | DP   | EP  | CE    | CXP | Product ion | DP   | EP  | CE  | CXP |          |
| Fatty acids                         |                                   |               |             |      |     |       |     |             |      |     |     |     |          |
| Arachidic acid                      | [M+HCOO] <sup>-</sup>             | 357.4         | 311.4       | -5   | -10 | -12   | -21 | 45.1        | -5   | -10 | -40 | -5  | 14.5     |
| Behenic acid                        | [M+HCOO] <sup>-</sup>             | 385.4         | 339.4       | -60  | -11 | -15   | -10 | 321.4       | -60  | -11 | -47 | -16 | 16.0     |
| Docosahexaenoic acid                | [M-H] <sup>-</sup>                | 373.3         | 327.3       | -60  | -10 | -10   | -21 | 283.4       | -60  | -10 | -20 | -20 | 8.8      |
| Erucic acid                         | [M+HCOO] <sup>-</sup>             | 383.2         | 337.3       | -95  | -10 | -12   | -23 | 45.0        | -95  | -10 | -44 | -5  | 14.6     |
| Gondoic acid                        | [M-H] <sup>-</sup>                | 309.4         | 291.5       | -167 | -11 | -32.9 | -19 | 155.0       | -167 | -11 | -37 | -10 | 12.7     |
| Lignoceric acid                     | [M+HCOO] <sup>-</sup>             | 413.2         | 367.3       | -65  | -10 | -12   | -23 | 45.0        | -65  | -10 | -42 | -5  | 18.6     |
| Linoleic acid                       | [M+HCOO] <sup>-</sup>             | 325.2         | 279.2       | -60  | -12 | -10   | -21 | 261.0       | -60  | -12 | -35 | -23 | 9.0      |
| Linolenic acid                      | [M+HCOO] <sup>-</sup>             | 323.3         | 277.2       | -65  | -6  | -8    | -17 | 259.3       | -65  | -6  | -27 | -17 | 8.2      |
| Margaric acid                       | [M+HCOO] <sup>-</sup>             | 315.4         | 269.3       | -45  | -13 | -10   | -17 | 45.0        | -10  | -10 | -32 | -5  | 11.0     |
| Miristoleic acid                    | [M+HCOO] <sup>-</sup>             | 271.3         | 225.3       | -45  | -11 | -20   | -17 | 45.0        | -30  | -10 | -26 | -7  | 6.6      |
| Myristic acid                       | [M+HCOO] <sup>-</sup>             | 273.2         | 227.2       | -5   | -10 | -18   | -15 | 45.0        | -5   | -10 | -26 | -7  | 8.4      |
| Oleanolic acid                      | [M+NH <sub>4</sub> ] <sup>+</sup> | 474.3         | 439.4       | 146  | 10  | 15    | 32  | 191.2       | 146  | 10  | 27  | 12  | 7.8      |
| Oleic acid                          | [M+HCOO] <sup>-</sup>             | 327.2         | 281.2       | -50  | -10 | -14   | -17 | 45.1        | -50  | -10 | -34 | -5  | 10.8     |
| Palmitic acid                       | [M-H] <sup>-</sup>                | 255.1         | 237.3       | -170 | -10 | -30   | -17 | 44.9        | -55  | -10 | -38 | -5  | 10.4     |
| Palmitoleic acid                    | [M+HCOO] <sup>-</sup>             | 299.3         | 253.3       | -55  | -10 | -18   | -15 | 44.7        | -55  | -10 | -34 | -7  | 8.5      |
| Stearic acid                        | [M+HCOO] <sup>-</sup>             | 329.3         | 283.3       | -60  | -12 | -9    | -22 | 265.5       | -60  | -12 | -41 | -16 | 12.7     |
| Carnitines                          |                                   |               |             |      |     |       |     |             |      |     |     |     |          |
| Palmitoyl-L-carnitine hydrochloride | [M+H] <sup>+</sup>                | 400.3         | 341.0       | 173  | 10  | 24    | 14  | 239.0       | 173  | 10  | 28  | 14  | 6.2      |
| Oleoyle-L-carnitine hydrochloride   | [M+H] <sup>+</sup>                | 426.3         | 367.0       | 120  | 11  | 26    | 17  | 265.0       | 120  | 11  | 30  | 13  | 6.5      |
| Esters                              |                                   |               |             |      |     |       |     |             |      |     |     |     |          |
| Ethyl linoleate                     | [M+H+H <sub>2</sub> O]            | 326.3         | 263.2       | 26   | 10  | 12    | 20  | 95.0        | 26   | 10  | 35  | 8   | 12.6     |
| Ethyl oleate                        | [M+H+H <sub>2</sub> O]            | 328.3         | 311.3       | 61   | 10  | 13    | 22  | 265.2       | 211  | 10  | 13  | 22  | 14.0     |

| Compound                                                      | Ionization Mode                      | Precursor ion | Q1          |     |    |      |     | Q2          |     |    |     | RT (min) |      |
|---------------------------------------------------------------|--------------------------------------|---------------|-------------|-----|----|------|-----|-------------|-----|----|-----|----------|------|
|                                                               |                                      |               | Product ion | DP  | EP | CE   | CXP | Product ion | DP  | EP | CE  |          | CXP  |
| Ethyl stearate                                                | [M+H] <sup>+</sup>                   | 313.3         | 285.3       | 211 | 10 | 19   | 16  | 71.1        | 211 | 10 | 25  | 8        | 15.9 |
| Methyl linoleate                                              | [M+H+H <sub>2</sub> O]               | 312.3         | 295.3       | 26  | 10 | 11   | 20  | 263.2       | 26  | 10 | 13  | 14       | 11.5 |
| Methyl oleate                                                 | [M+H+H <sub>2</sub> O]               | 314.3         | 297.4       | 41  | 10 | 11   | 18  | 149.0       | 116 | 10 | 25  | 14       | 13.0 |
| Methyl palmitate                                              | [M+H+H <sub>2</sub> O]               | 288.5         | 271.2       | 71  | 10 | 11   | 24  | 71.2        | 151 | 10 | 27  | 8        | 12.7 |
| Methyl stearate                                               | [M+H+H <sub>2</sub> O]               | 316.3         | 299.3       | 86  | 10 | 13   | 24  | 71.2        | 86  | 10 | 31  | 8        | 14.8 |
| Glicerophospholipids                                          |                                      |               |             |     |    |      |     |             |     |    |     |          |      |
| 1,2-dioleoyl-sn-glycero-3-phospho-rac-(1-glycerol)sodium salt | [M-Na+NH <sub>4</sub> ] <sup>+</sup> | 792.5         | 603.6       | 50  | 6  | 35   | 15  | 339.3       | 50  | 6  | 45  | 14       | 16.3 |
| 1,2-dioleoyl-sn-glycero-3-phosphocholine                      | [M+H] <sup>+</sup>                   | 786.6         | 184.0       | 116 | 3  | 27   | 14  | 125.0       | 116 | 3  | 134 | 14       | 18.0 |
| 1-palmitoyl-sn-glycero-3-phosphocholine                       | [M+H] <sup>+</sup>                   | 496.4         | 478.4       | 100 | 14 | 27   | 14  | 184.0       | 100 | 14 | 35  | 14       | 6.5  |
| Glicerolipidis                                                |                                      |               |             |     |    |      |     |             |     |    |     |          |      |
| 1-linoleoyl-rac-glycerol                                      | [M+H] <sup>+</sup>                   | 355.3         | 337.0       | 300 | 3  | 15   | 16  | 263.0       | 300 | 3  | 13  | 21       | 7.6  |
| 1-oleoyl-rac-glycerol                                         | [M+H] <sup>+</sup>                   | 357.3         | 265.2       | 250 | 10 | 15   | 13  | 283.2       | 250 | 10 | 13  | 17       | 9.2  |
| Glyceryl tripalmitoleate                                      | [M+NH <sub>4</sub> ] <sup>+</sup>    | 818.7         | 547.0       | 300 | 4  | 28   | 27  | 237.3       | 300 | 4  | 53  | 12       | 23.7 |
| 1-monopalmitoleoyl-rac-glycerol                               | [M+H] <sup>+</sup>                   | 329.3         | 219.3       | 104 | 7  | 17.5 | 17  | 121.2       | 104 | 7  | 29  | 9        | 7.1  |
| Sfingolipid                                                   |                                      |               |             |     |    |      |     |             |     |    |     |          |      |
| Ceramide                                                      | [M+H] <sup>+</sup>                   | 566.6         | 548.6       | 100 | 8  | 18   | 14  | 264.0       | 100 | 8  | 41  | 14       | 19.8 |

| Compound        | Ionization Mode                   | Precursor ion | Q1          |     |    |    |     | Q2          |     |    |    | RT (min) |      |
|-----------------|-----------------------------------|---------------|-------------|-----|----|----|-----|-------------|-----|----|----|----------|------|
|                 |                                   |               | Product ion | DP  | EP | CE | CXP | Product ion | DP  | EP | CE |          | CXP  |
| Sterols         |                                   |               |             |     |    |    |     |             |     |    |    |          |      |
| Brassicasterolo | [M+H] <sup>+</sup>                | 416.4         | 381.3       | 16  | 10 | 13 | 20  | 125.1       | 16  | 10 | 21 | 10       | 15.4 |
| Cholesterol     | [M+H] <sup>+</sup>                | 369.5         | 147.0       | 140 | 8  | 25 | 35  | 135.0       | 140 | 8  | 35 | 23       | 16.1 |
| Desmosterolo    | [M+NH <sub>4</sub> ] <sup>+</sup> | 402.4         | 367.2       | 146 | 10 | 13 | 20  |             |     |    |    |          | 14.1 |
| Ergosterolo     | [M+H] <sup>+</sup>                | 397.3         | 69.3        | 6   | 10 | 33 | 14  | 379.4       | 6   | 10 | 17 | 22       | 14.9 |
| Lupeol          | [M+H] <sup>+</sup>                | 444.4         | 427.4       | 35  | 5  | 17 | 14  | 409.4       | 35  | 5  | 17 | 14       | 15.4 |
| Uvaol           | [M+NH <sub>4</sub> ] <sup>+</sup> | 460.4         | 443.4       | 100 | 10 | 11 | 22  | 191.4       | 100 | 10 | 21 | 10       | 7.6  |

DP- declustering potential; EP- entrance potential; CE- collision energy; CXP- collision cell exit potential; RT- retention time. DP, EP, CE, and CXP are expressed in volts.
