# Supplementary material for: Comprehensive Lipid Profile of ‘Maraština’ Grape Skins from Dalmatia
Source: MDPI journal article supplement (doi:10.3390/app13116446), 2023-05-25
Supplement: s1 [file s1]

**Table S2.** Climate data for eleven vineyards during vintage 2021 (January-September)

| Vineyard            | Meteorological station | Month     | Average daily temperature (°C) | Average minimum temperature (°C) | Average maximum temperature (°C) | Sum of precipitation (mm) | Monthly sum of sunshine hours (h) |
|---------------------|------------------------|-----------|--------------------------------|----------------------------------|----------------------------------|---------------------------|-----------------------------------|
| M1, M2, M3, and M4  | Zadar                  | January   | 8                              | 5                                | 11                               | 113                       | 95                                |
|                     |                        | February  | 10                             | 7                                | 13                               | 59                        | 126                               |
|                     |                        | March     | 10                             | 6                                | 15                               | 16                        | 249                               |
|                     |                        | April     | 12                             | 9                                | 16                               | 54                        | 241                               |
|                     |                        | May       | 18                             | 15                               | 21                               | 30                        | 291                               |
|                     |                        | June      | 24                             | 20                               | 29                               | 3                         | 365                               |
|                     |                        | July      | 26                             | 22                               | 30                               | 37                        | 334                               |
|                     |                        | August    | 25                             | 21                               | 30                               | 32                        | 333                               |
|                     |                        | September | 22                             | 18                               | 26                               | 55                        | 281                               |
| M5                  | Knin                   | January   | 4                              | 0                                | 9                                | 201                       | 76                                |
|                     |                        | February  | 7                              | 2                                | 14                               | 68                        | 129                               |
|                     |                        | March     | 8                              | 2                                | 15                               | 28                        | 236                               |
|                     |                        | April     | 11                             | 5                                | 17                               | 68                        | 203                               |
|                     |                        | May       | 16                             | 10                               | 23                               | 29                        | 255                               |
|                     |                        | June      | 23                             | 15                               | 31                               | 13                        | 320                               |
|                     |                        | July      | 26                             | 18                               | 34                               | 25                        | 317                               |
|                     |                        | August    | 24                             | 17                               | 32                               | 37                        | 316                               |
|                     |                        | September | 20                             | 13                               | 28                               | 74                        | 273                               |
| M6 and M7           | Split                  | January   | 8                              | 6                                | 10                               | 108                       | 92                                |
|                     |                        | February  | 10                             | 8                                | 13                               | 47                        | 152                               |
|                     |                        | March     | 11                             | 8                                | 14                               | 29                        | 238                               |
|                     |                        | April     | 13                             | 10                               | 17                               | 61                        | 228                               |
|                     |                        | May       | 19                             | 15                               | 22                               | 79                        | 283                               |
|                     |                        | June      | 26                             | 22                               | 30                               | 4                         | 347                               |
|                     |                        | July      | 29                             | 25                               | 33                               | 16                        | 349                               |
|                     |                        | August    | 27                             | 24                               | 32                               | 127                       | 342                               |
|                     |                        | September | 23                             | 20                               | 27                               | 22                        | 290                               |
| M8, M9, M10 and M11 | Vela Luka              | January   | 8,0                            | 3,5                              | 12,0                             | 148,0                     | -                                 |
|                     |                        | February  | 9,4                            | 4,8                              | 14,3                             | 51,9                      | -                                 |
|                     |                        | March     | 9,6                            | 4,1                              | 14,9                             | 28,4                      | -                                 |
|                     |                        | April     | 12,7                           | 6,7                              | 17,6                             | 23,7                      | -                                 |
|                     |                        | May       | 18,6                           | 12,6                             | 23,2                             | 54,2                      | -                                 |
|                     |                        | June      | 24,8                           | 16,9                             | 30,1                             | 5,7                       | -                                 |
|                     |                        | July      | 27,4                           | 19,6                             | 32,3                             | 4,8                       | -                                 |
|                     |                        | August    | 26,5                           | 19,4                             | 32,0                             | 67,5                      | -                                 |
|                     |                        | September | 21,6                           | 14,9                             | 27,8                             | 26,0                      | -                                 |

Data were received from Croatian Meteorological and Hydrological Service; - there is no data.
